# Supplementary material for: Socioeconomic status is associated with global diabetes prevalence
Source: PubMed Central journal article supplement (PMC5546491; doi:10.18632/oncotarget.17902), 2017-05-16
Supplement: oncotarget-08-44434-s001.pdf [file oncotarget-08-44434-s001.pdf]

## **Socioeconomic status is associated with global diabetes prevalence**

### **Supplementary Materials**

**Supplementary Table 1: characteristics of the included studies.** See [Supplementary\\_Table\\_1](#)
